# Supplementary material for: Contralateral second dose improves antibody responses to a 2-dose mRNA vaccination regimen
Source: JCI journal article supplement (doi:10.1172/jci176411), 2024-01-16

- 1 **Enrollment and cohort composition:** Total observational cohort size, group composition and breakdown
- 2 by available data, enrollment, exclusions, vaccination status, natural infection status.

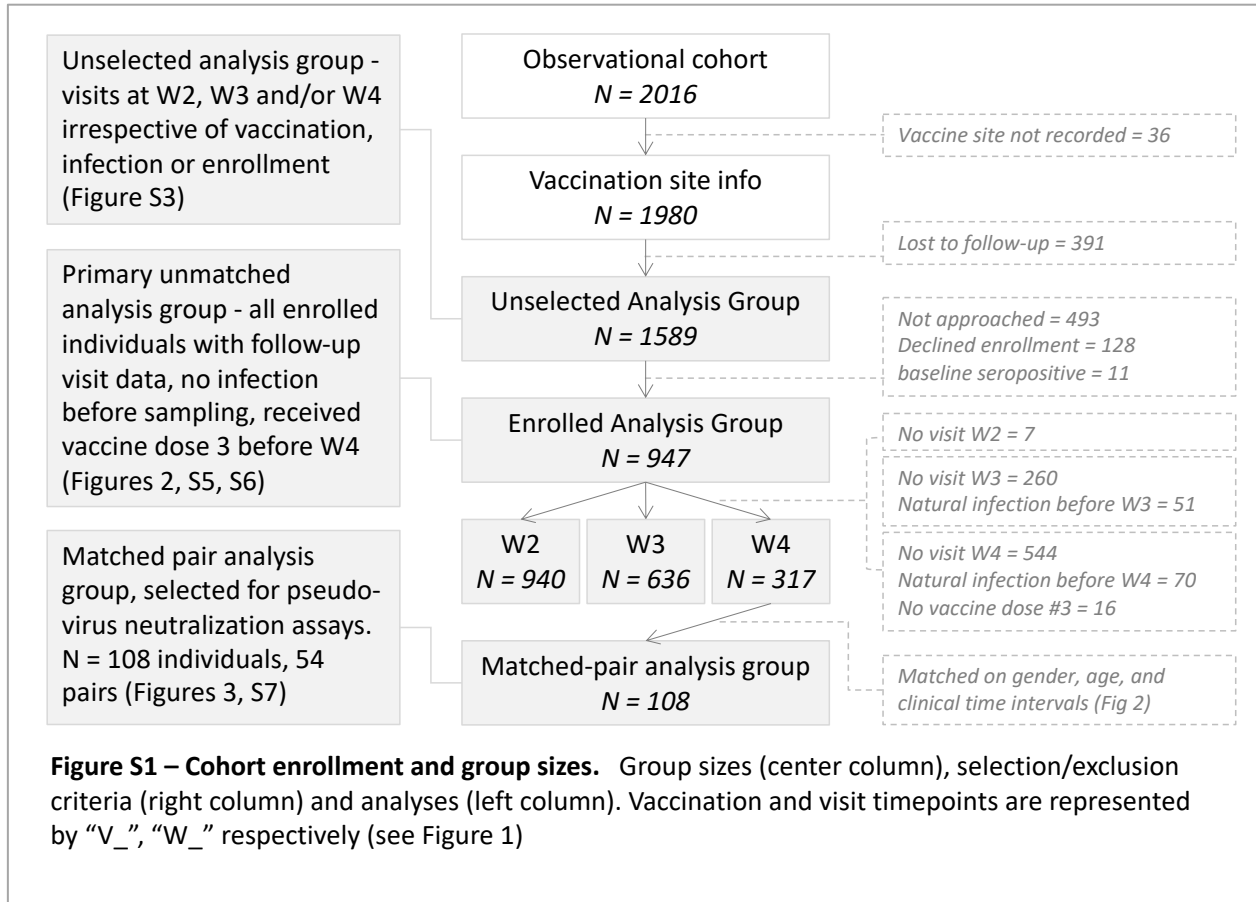

3 **Baseline characteristics by group (Enrolled Analysis Group):** To examine factors potentially influencing  
 4 immune responses differently between groups, we compared time and vaccination intervals and age  
 5 distribution between same-arm and opposite arm groups. These measures were closely matched in  
 6 these two groups (**Table 1 and Figure S2**) suggesting that the groups are comparable.

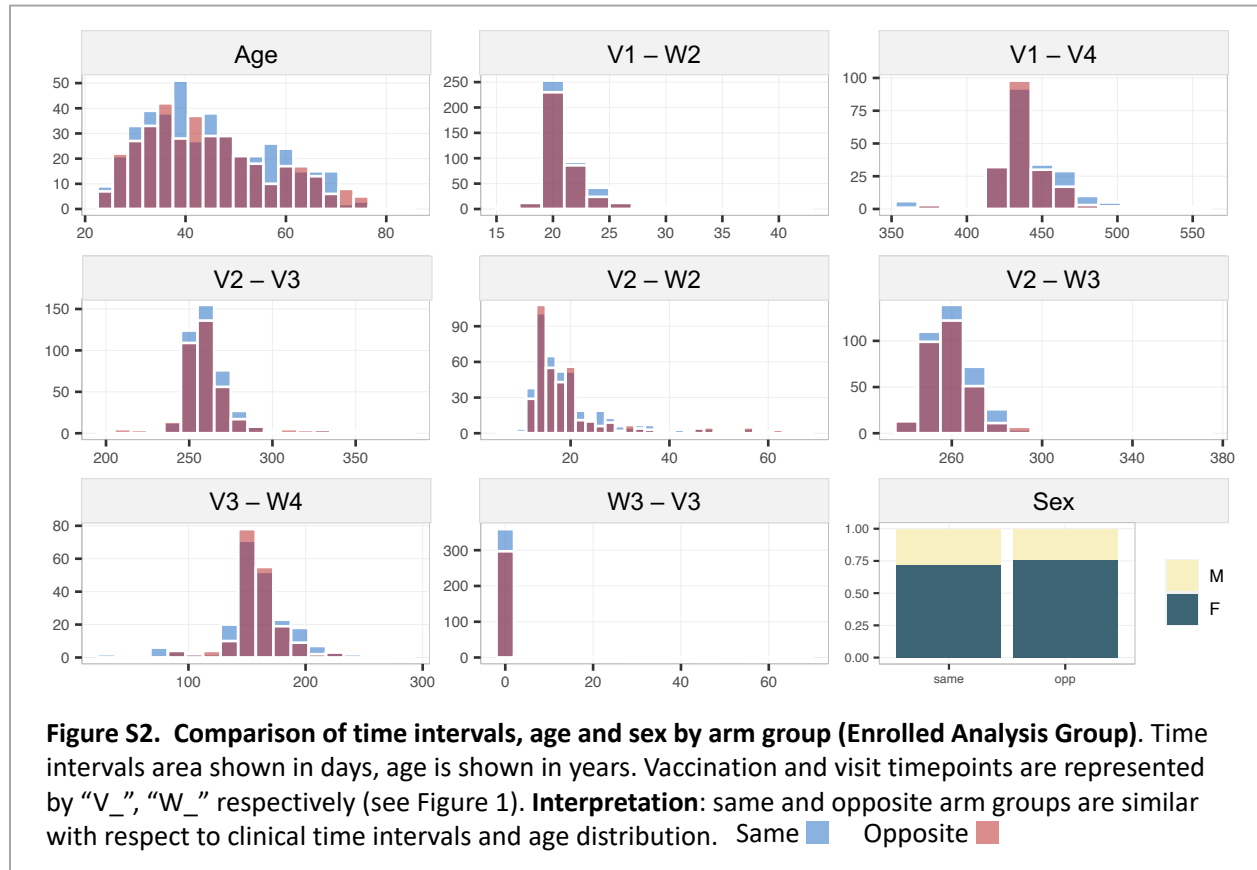

7

8

9 **Effect of arm choice in an unselected population (Unselected Analysis Group):** To understand the  
 10 effect of arm selection at V1 and V2 in a “real-world” unselected population we repeated analysis of Ig  
 11 and IgG responses at W3 and W4 in all cohort patients with available data regardless of infection status  
 12 or receipt (or lack of receipt) of boosting at V3 (N = 1225). Qualitatively similar results were obtained,  
 13 indicating a significant and persistent long-term increase in SARS-CoV-2-specific antibody titers in those  
 14 receiving boosting in the opposite arm relative to initial vaccination. As expected, the magnitude of the  
 15 effect in this group is smaller, likely reflecting the impact of confounding variables (**Figure S3**).

16

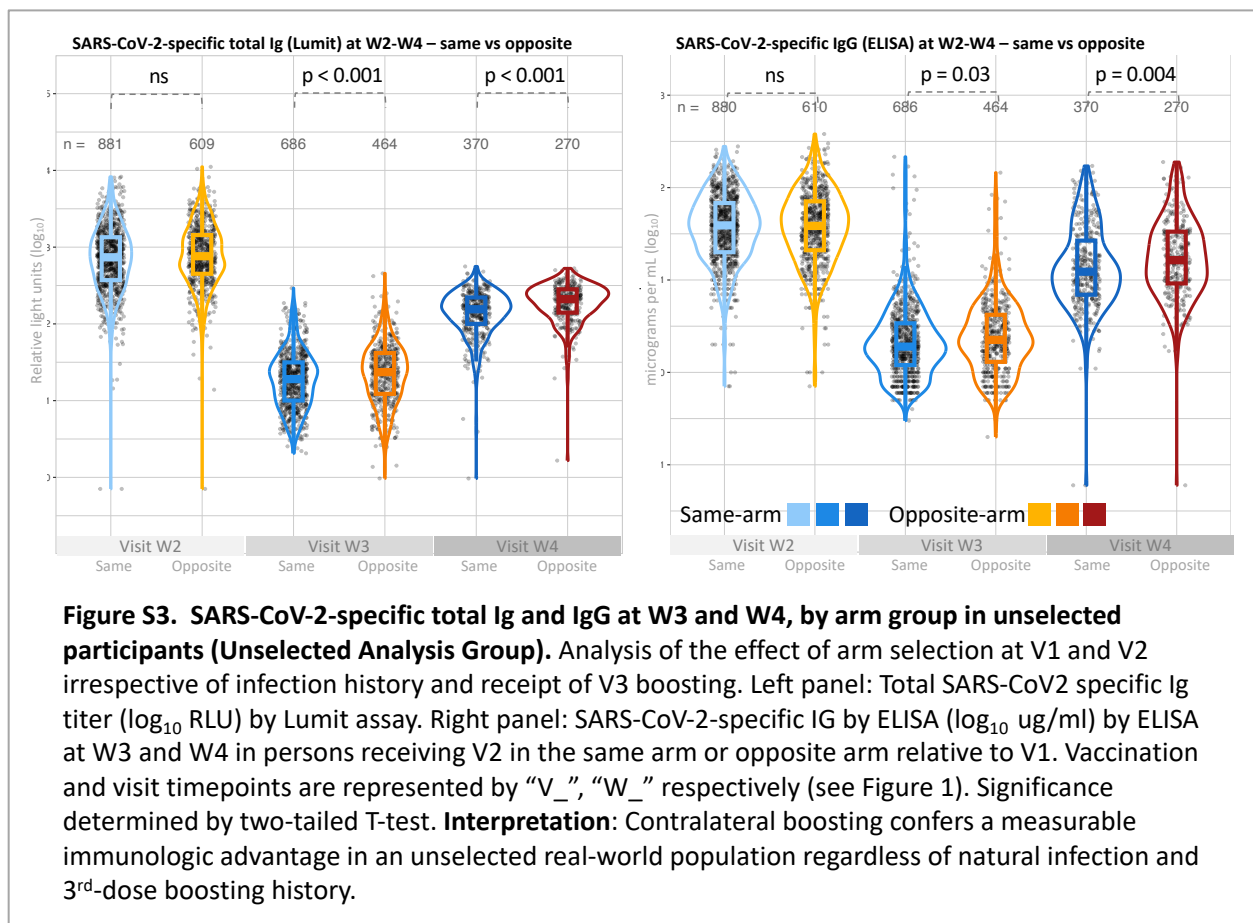

17

18

19 **Arm selection in participants with natural infection:** To examine the effect of arm selection on immune  
20 responses after boosting in individuals with history of natural COVID-19 infection, we performed  
21 analyses including only individuals positive for SARS-CoV-2 nucleocapsid-specific antibodies at W3.  
22 Altogether, 139 participants had positive NC titers at W3, including 75 in the same-arm group and 63 in  
23 the opposite arm group. Qualitatively similar results were seen in this subgroup, with higher SARS-CoV2-  
24 specific Ig and IgG responses in those receiving vaccination in the opposite arm at V2. This trend was  
25 seen in all groups but only reached significance at W4 in measures of total Ig (**Figure S4**).

26

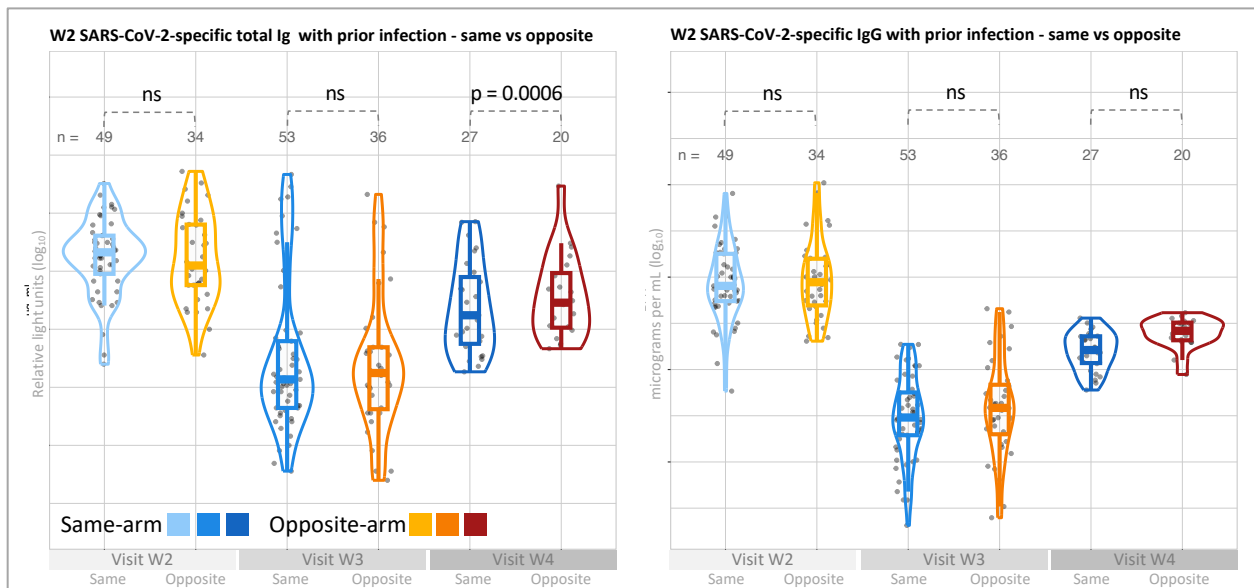

**Figure S4. SARS-CoV-2-specific total Ig and IgG at W2, W3 and W4, by arm group in participants with natural infection prior to W3.** Analysis of the effect of arm selection at V2 in from among 139 participants with one or more evaluable timepoints and a history of natural COVID-19 infection between V1 and W3. **Left panel:** Total SARS-CoV2 specific Ig titer ( $\log_{10}$  RLU) by Lumit assay. **Right panel:** SARS-CoV-2-specific IG by ELISA ( $\log_{10}$  ug/ml) by ELISA at W3 and W4 in persons receiving V2 in the same arm or opposite arm relative to V1. Vaccination and visit timepoints are represented by “V\_”, “W\_” respectively (see Figure 1). Significance determined by two-tailed T-test. **Interpretation:** Among those with a history of natural infection, contralateral vaccination at V2 is associated with a trend towards higher antibody titers at late timepoints W3 and W4, compared with ipsilateral boosting.

27

28 **Arm selection at vaccine dose V3 (Enrolled Analysis Group):** To examine the effect of arm selection at  
 29 vaccine dose 3 on immune responses, we sorted all study participants into four groups based on  
 30 patterns of arm selection across 3 doses: RRR and LLL (“Same-Same”), RLR and LRL (“Opposite-  
 31 Opposite”), RRL and LLR (“Same-Opposite”), and RLL and LRR (“Opposite-Same”). SARS-CoV-2-specific  
 32 total Ig and IgG at W4 were compared across groups. Here, OS and OO groups have greater responses  
 33 than SS and SO groups. This trend was significant for total Ig, but did not reach significance for IgG.  
 34 These results suggest that the long-term advantage in immune responses resulting from arm alternation

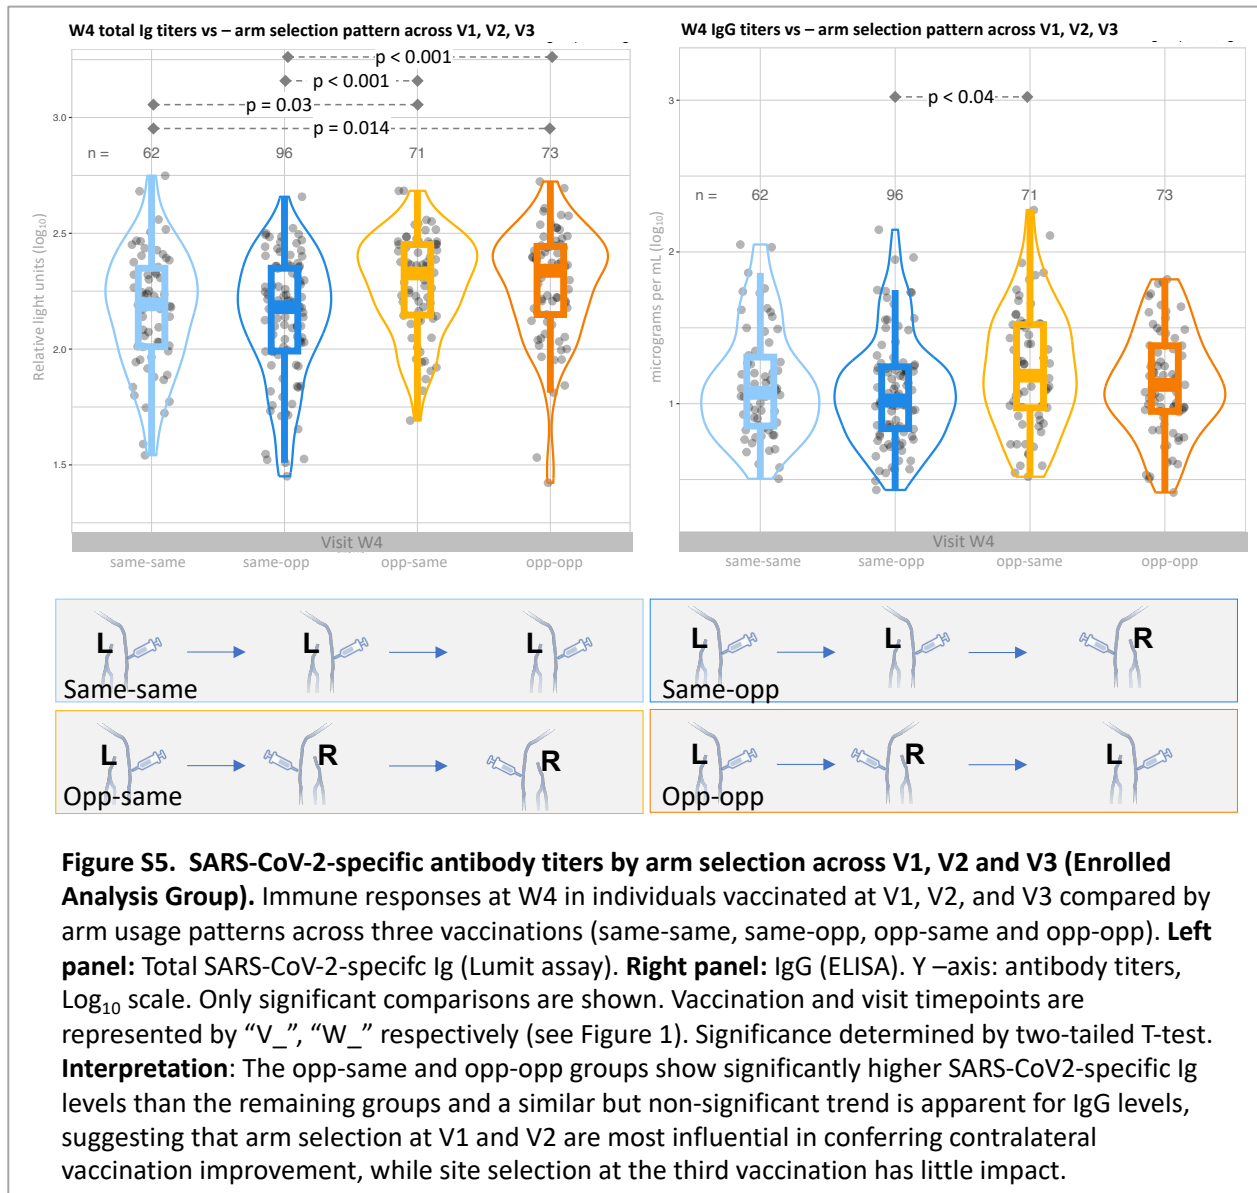

35 in this setting pertain to the first two vaccine doses, while arm selection at the third dose has little effect

36 **(Figure S5).**

37

38 **Time dependence of contralateral advantage at W2 (Unselected Analysis Group):** To define the time-  
39 dependence of immunologic improvements resulting from contralateral arm vaccination, we analyzed  
40 SARS-CoV-2-specific total Ig and IgG at W2 as a function of time elapsed since V2. While this study was  
41 not designed to assess this variable, the large number of participants presenting at a range of times after  
42 V2 offered the possibility of insight into this question in a preliminary cross-sectional analysis. The  
43 starting hypothesis is that shortly after V2 vaccination, same-arm boost recipients would show an  
44 advantage due to stimulation of secondary germinal centers within the ipsilateral lymph node group,  
45 while boosting on the contralateral side would initiate de-novo responses on the contralateral side  
46 during this timeframe. However, at subsequent timepoints an overall advantage of contralateral  
47 boosting would emerge, with a cross-over time determined in part by the time required for emergence  
48 of antibodies derived from the contralateral LN group. Using locally-weighted polynomial regression  
49 (LOESS) we found that antibody response patterns in these two groups were consistent with this  
50 expectation, with an apparent cross-over time within the first 3 weeks after V2 (**Figure S6**).

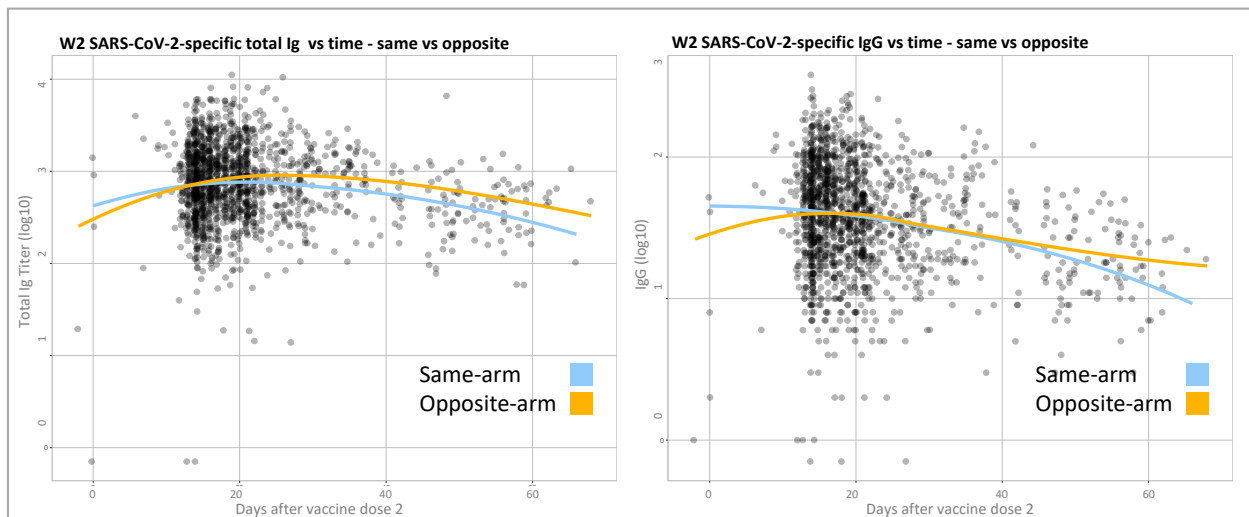

**Figure S6. Time dependence of contralateral advantage (Unselected Analysis Group).** Local regression plot of SARS-CoV-2-specific serum antibodies at visit W2 versus time since vaccine dose 2. **Left panel:** Total SARS-CoV2 specific Ig titer ( $\log_{10}$  RLU) by Lumit assay. **Right panel:** SARS-CoV-2-specific IG by ELISA ( $\log_{10}$  ug/ml). **Interpretation:** Local regression (LOESS) lines are consistent with a transition from higher levels with ipsilateral boosting to higher levels with contralateral boosting, with a crossover time at approximately 2-3 weeks after vaccine dose 2.

51 **Effect of arm selection at V2 on antibody quality (Matched Pair Group):** The improved neutralization  
 52 titers observed at W4 in those receiving boosting in the opposite arm at V2 could be explained by higher  
 53 antibody titers or improved antibody affinity. We therefore analyzed the ratio of neutralization to  
 54 binding antibodies (either total Ig, or IgG) at W3 and W4. Comparisons were made with respect to  
 55 neutralization against D146G (early virus) and B.1.1.529 (Omicron variant). In these analyses we initially  
 56 see a lower ratio at W3 in the opposite arm group, and infer lower antibody affinity at this timepoint.  
 57 However, the trend reverses by W4, suggesting that in addition to higher total antibody titers (e.g.  
 58 Figure S3), affinity maturation (as reflected in the calculated ratio) also begins to contribute to improved  
 59 neutralization titers between W3 and W4 in those receiving opposite-arm boosting (**Figure S7**).

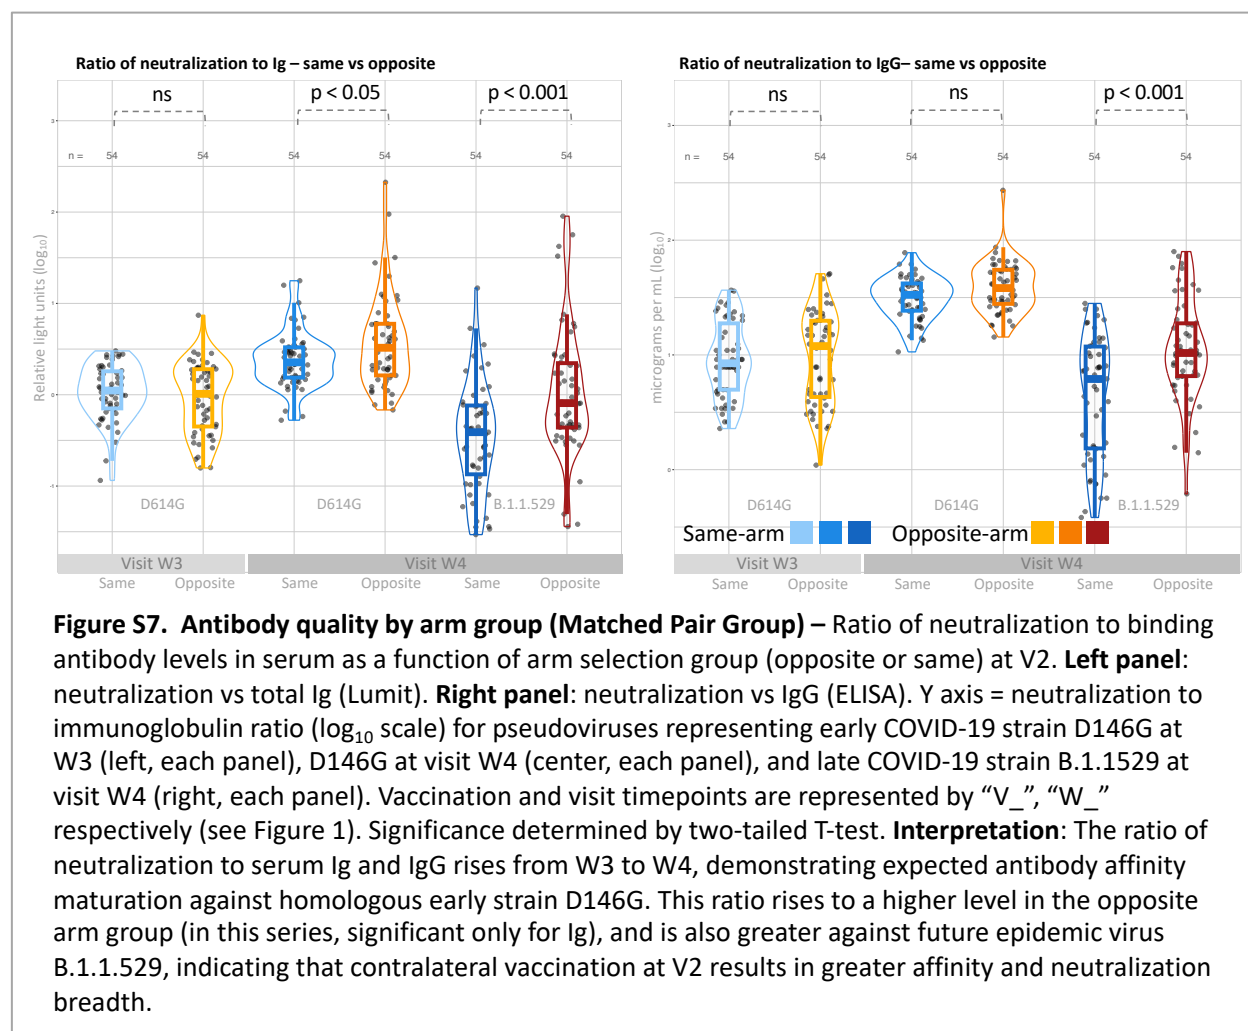

Supplement: sd1 [file 1]
